# Supplementary material
Source: PubMed Central journal article supplement (PMC3333485)

## **Supplementary webappendix**

This webappendix formed part of the original submission and has been peer reviewed. We post it as supplied by the authors.

Supplement to: Launer LJ, Miller ME, Williamson JD, et al, for the ACCORD MIND investigators. Effects of intensive glucose lowering on brain structure and function in people with type 2 diabetes (ACCORD MIND): a randomised open-label substudy. *Lancet Neurol* 2011; published online Sept 28. DOI:10.1016/S1474-4422(11)70188-0.

**Members of the Action to Control Cardiovascular Risk in Diabetes (ACCORD) Memory in Diabetes (MIND) Study Group**

**National Institute on Aging Intramural Research Program, Bethesda, MD:** L.J. Launer (PI), R. Kramer

**MIND Coordinating Center:** Wake Forest University School of Medicine, Winston-Salem, NC: J.D. Williamson (PI), M. Miller, L. Coker, J. Lovato, L. Lovato, J. Hepler, D. Felton, L. Andrews, S. Mayer, C. Carter, N. Woolard

**MIND MR Reading Center:** Department of Radiology, University of Pennsylvania, Hospital of the University of Pennsylvania, Philadelphia, PA: R.N. Bryan (PI), L. Desiderio, C. Davatzikos, M. Bilello, E. Melhem, D. Koka, E. Parmpi, H. Battapady, G. Erus

**ACCORD Clinical center networks (CCNs) and clinical sites:**

**Canadian CCN:** Population Health Research Institute, Hamilton Health Sciences/McMaster University, Canadian Diabetes Outcome Researchers (CANDOR Network), Hamilton, Ontario, Canada: H.C. Gerstein, S. Yusuf, S. Capes, Z. Punthakee, T. Cukierman-Yaffe, M. Vallis, S. Hall, P. Mackie, V. Reiding, R. Russo, B. Tadeson, K. Thompson

**MIND:** H.C. Gerstein (PI), T. Cukierman-Yaffe

**Canadian clinical sites:**

McMaster Medical Centre, Hamilton, Ontario, Canada: S. Capes, Z. Punthakee, A. Smith, T. Valla  
Memorial University of Newfoundland, St. John's, Newfoundland, Canada: C. Joyce, M. Parsons, B. Rowe  
St. Joseph's Health Care London, London, Ontario, Canada: I. Hramiak, M. Gehring, S. Tereschyn  
Ottawa Hospital, Division of Endocrinology and Metabolism, Ottawa, Ontario, Canada: H. Lochnan, J. Maranger, M. McLean, R. Sigal

Winnipeg Regional Health Authority, Health Science Center, Diabetes Research Group, Winnipeg, Manitoba, Canada: V. Woo, L. Berard, T. Anderlic, A. Bernard, A. Mawani

Queen Elizabeth II Health Sciences Centre, Halifax, Nova Scotia, Canada: C. Abbott, E. Ur, G. McCarthy, M. Yuille, H. Murdock, T. Palmer, A. M. Patterson

**ACCORD Minnesota-Iowa CCN:** Berman Center for Outcomes & Clinical Research, Minneapolis, MN: R.H. Grimm, Jr, B.R. Kirpach, M.M. Bartkoske, C.M. Boyce, N. Druckman, A.M. Gillett, J.A. Levin, G.J. Livingston, A.M. Murray, K.L. Margolis, C. Truwit

**MIND:** A.M. Murray (PI), G.J. Livingston, K.L. Margolis

**MIND MRI:** C. Truwit

**Minnesota-Iowa clinical sites:**

Hennepin ACCORD Clinic, Minneapolis, MN: S. Kempainen, M. Madden, K. Hall, K. Wood.

International Diabetes Center, Minneapolis, MN: R. Bergenstal, R. Cuddihy, B. Davick, S. List, D. Whipple, C. Ashanti, D. Kendall

University of Minnesota, Minneapolis, MN: E.R. Seaquist, M.V. Mech, L.E. Benedict, D.J. Demmon, A.F. Kumar, S.M. Martinson, S.A. Miller, C. Pease, J.P. Rao, J.B. Redmon, J.E. Swanson, J.K. Wimmer, Y. Okorochoa, M. Stiles, C. Kodl, C. Chadha

University of Minnesota, Phalen Village Clinic, St. Paul, MN: KA. Peterson, L.A. Seaquist, C. Boese, T.J. Mendenhall, A.M. Peterson, A. Rudelt, T.M. Schrock

Riverside Health Partners Clinic, Department of Endocrinology, Minneapolis, MN: J.M. Sperl-Hillen, P.J. O'Connor, M.E. Busch, A. Chung, B.K. Klein, N. Krugen, T. Bunkers-Lawson, H.L. Ekstrom, H.S. Gunderson,

B.M. Johnson, J.H. MacIndoe, D.J. Prewedo, J.L. Rawl, C.M. Roethke, Mary Quinlan, C.R. Fox, B.M. Bate, Q.T. Cao, M.M. Ohnstad, P.J. Meyers  
*University of Iowa, Health Care Diabetes Clinical Research and Programs, Iowa City, IA: W.I. Sivitz, S.M. Wayson, T.A. Lower, K.A. Ochs, D. Wells*

**ACCORD Northeastern CCN:** *Columbia University College of Physicians and Surgeons, New York, NY: J.T. Bigger, C.R. Lopez-Jimenez, R. Bornholdt, L. Busaca, H.N. Ginsberg, P. Gonzales, D. Gosh, P. Love, A. Kosok, E. Robinson, R. Steinman, C. Watson, G. Reyes*

**MIND:** R.M. Lazar (PI), K. Slane, C.R. Lopez-Jimenez, J. Hirsch, T. Brown

**MIND MRI:** *Columbia University Medical Center, New York, NY: J. Hirsch, T.R. Brown, S.M. Dashnaw, J. Cruz-Lobo*

**Northeastern clinical sites:**

*Jacobi Medical Center, Bronx, NY: U.K. Schubart, J. Russo, N. Vincenty, K. Ibarando*

*Albert Einstein General Clinical Research Center, Bronx, NY: M.H. Alderman, L. Carroll, M.J. Sanguily, A.C. Mayer, L. Ramos*

*Cornell Internal Medicine Associates, New York, NY: D. Brillon, J. Cordero, R. Chiong, K. Hyams, C. Charles*  
*The Cooper Health System, Cherry Hill, NJ: A. Bastien, S. Grudzinski, P. Niblack, L. Abreu, K. Brown, M. Casale, D. Dougherty, D. Linneman, M.A. Salvador, P. Zee, D. Hyman, D. Atabek, J. Miranda, I. Kumar, C. Baker*

*Great Lakes Medical Clinic Research, Westfield, NY: D.F. Brautigam, R. Fischer, D.M. Scharf, E. Brautigam, B. Nunn, J.M. Chiarot, C. Flanders*

*Naomi Berrie Diabetes Center, New York, NY: R. Goland, P. Kringas, J. Montes, J. Belle*

*Ambulatory Care Network at Columbia University, New York, NY: A. Getaneh, J. Ramirez, G. Kranwinkel, E. Vasquez*

*Irving Diabetes Research Unit, New York, NY: D.S. Donovan, G. Febres, C. Hernandez, M.A. Jonaitis, C. Lopez-Jimenez*

*State University of New York Downstate Medical Center, Brooklyn, NY: M.A. Banerji, M. Norton, P. Patel, S. Hirsch*

*Kings County, Brooklyn, NY: M.A. Banerji, M. Norton, P. Patel, S. Hirsch*

**ACCORD Ohio-Michigan CCN:** *Case Western Reserve University, Division of Clinical and Molecular Endocrinology, Cleveland, OH: S. Genuth, F. Ismail-Beigi, M. Thibonnier, L. Vargo, C. Kelly, T. Bongorno, A. Dolish, L. Pavlik, M. Tiktin, S. Isteitieh, A. Bartlett, K. Yee, T. Kulow*

**MIND:** K. Horowitz (PI), L. Pavlik, A. Dolish, M. Tiktin

**MIND MRI:** *University Hospitals of Cleveland, Department of Radiology, Cleveland, OH: J. Sunshine, M. Clampitt*

**Ohio-Michigan clinical sites:**

*University Hospitals of Cleveland, Division of Endocrinology, and University Hospitals Westlake Medical, Cleveland, OH: F. Ismail-Beigi, A. Krikorian, L. Moore, L. Richardson, E. Coles-Herman, J. Frankino, A. Sood, L. Hustak, M. Julius, L. Pavlik, T. Ross, L. Long, M.K. Sullivan, L. Strauss, K. Behm, F. Eskandari, C. Hall, D. Hayes, K. Horowitz, S. Isteitieh, Z. Madhun, E. Seeholzer, J. Shina, H. Taylor, A. Schnall*

*St. Vincent Charity Hospital, Lipid Research Center, Cleveland, OH: L.S. Sadler, M. Griffith, A. Hornsby, K. Klyn, E. Ospelt, L. Long, M. DeSmit, P. McCann, N.P. Schmidt, T. Kulow, J. Zaletal*

*University Suburban Health Center, South Euclid, OH: A.M. Schnall, L. Dragmen, R. Ellert, J. Smith, J. Leksan, T. Sussman*

*Cleveland Veterans Affairs (VA) Medical Center (VAMC), Department of Medicine, and Ravenna Community Based Outpatient Clinic, Cleveland, OH: F. Ismail-Beigi, L. Hustak, M. Julius, W. Schwing, C.*

Hall, K. Horowitz, S. Isteitieh, C. Johnson, E. Kern, M.A. Richmond, L. Richardson, K. Roberts, J. Shina, P. Suhan, H. Taylor, S. Watts, J. Martin, G.J. Strauss  
*Medical University of Ohio, Department of Medicine, Ruppert Health Center, Toledo, OH:* B. Akpunonu, R. Franco-Saenz, J. Gilmore, M. Gilmore, P. Ross, B. Bauer, R. Pop-Busui, J. Roman, Z. Blust  
*Henry Ford Health System–New Center One, Detroit, MI:* A. Thomas, D.M. Kahkonen, T. Cushman, M. Roman, A.M. Stys, K. White, M. Austin, C. Chatterton, J.K. Francis, C. Jones, D. Kruger, A. McLellan, F. Whitehouse, E. Higgins, S. Levy, A. Schoenherr

**ACCORD Southeastern CCN:** *Wake Forest University School of Medicine, Department of Public Health Sciences, Winston-Salem, NC:* D.C. Goff, Jr, J.H. Summerson, L. Crago, C.S. Blackwell, A. Bertoni, R.L. Blaine, J.K. Kirk, R.L. Spach, J. Williamson, J. Calles, J. Katula, D.B. Wishnietsky, N. Woolard, S. Mayer, L. Gordineer

**MIND:** J. Williamson (PI), N. Woolard, Jingzhong Ding

**MIND MRI:** *Wake Forest University School of Medicine, Center for Biomolecular Imaging, Winston-Salem, NC:* J. Maldjian, S. Kaminsky, D. Fuller

**Southeastern clinical sites:**

*Duke University Medical Center, Durham, NC:* M.N. Feinglos, J. Jones, G. Gedon-Lipscomb

*Wake Forest University School of Medicine, Department of Geriatrics/Gerontology, Winston-Salem, NC:* H.H. Atkinson, J. Stanfield, T. Delvalle-Fagan

*Downtown Health Plaza, Winston-Salem, NC:* C.F. Pedley, S. Mauney

*University of North Carolina, Diabetes Care Center, Chapel Hill, NC:* J.B. Buse, M.D. Duclos, R.E. Kirby, A. Goley, K. Vukojcic

*Holston Medical Group, Kingsport, TN:* J.L. Miller, W. Besterman, S.M. Norton, M. Surgener

*Carolinas Medical Center Family Practice, Charlotte, NC:* M. Dulin, T. Barringer, C. Morris, S. Norton

*Robeson Health Care Corporation, Fairmont Clinic, Fairmont, NC:* R. Peace, D.O. Stuart, J. Strickland, L. Cummings, J. Stanfield

*Robeson Health Care Corporation, Julian T. Pierce Clinic, Pembroke, NC:* R. Peace, J. Strickland, L. Cummings, J. Stanfield

*Wake Forest University School of Medicine, Departments of Internal Medicine and Endocrinology, Winston-Salem, NC:* J.R. Crouse, J. Ellis

*Tulane University Health Science Center, New Orleans, LA:* V. Fonseca, J. John-Kalarickal, S.M. Leger, K. Munshi

*Kaiser Permanente, Crescent Medical Center, Tucker, GA:* J. Barzilay, K. Bader, M. Elay

**ACCORD Western CCN:** *University of Washington, Seattle, WA:* J.L. Probstfield, M.D. Sullivan, C. Kingry, J.M. Johnson, A.S. Line, M.A. Corson, R. Knopp, E. Lipkin, C. Griswold, K. Liebert, A. Brown, D. Juliano, E.M. Kurashige, S. Moberg, J. Leader

**MIND:** *University of Washington, Seattle:* M.D. Sullivan (PI), J.M. Johnson

**Western MIND sites:**

*Northridge Hospital Medical Center, Cardiovascular Center, Northridge, CA:* M. Ariani, H. Gutierrez

*University of Washington Medical Center at Roosevelt, Family Medical Center, Seattle, WA:* R. Failor, A. Ellsworth, N. Jackson, K. Capoccia

*Idaho State University, Department of Family Medicine, Pocatello, ID:* R. Force, M. Macdonald, S. Koester, K. Pettingill

*Naval Medical Center San Diego, Cardiology Division, San Diego, CA:* P. Linz, P. Pepper, S. Griffin, J. Kozlowski, M. Engle, P. Gutierrez

*Oregon Health & Science University, Section of Diabetes, Portland, OR:* M. Riddle, P.A. McDaniel, S.C. Gammell-Matthews, B. MacNeil, S. DesRochers, R. Swift

*Washington State University, Spokane, WA:* C. Wysham, D. Weeks, L. Kuntsmann

*Kaiser Endocrine Clinic, San Diego, CA:* J. Dudl, P. Wu, L. Lyons, B. House, M. Murray, A. Palma, R. Stevenson

*Whittier Institute for Diabetes, Clinical Trials Department, La Jolla, CA:* G. Dailey, A. Philas-Tsimikas, A. Giannella, A. Bravo-Medina, M. Jacobson, E. Farro, S. Cruz, N. Juarez, C. Dadkhah

## Supplementary Material Figure and Table Legends

eTable 1. Baseline Characteristics in the ACCORD-MIND Cohort Compared to the Rest of ACCORD Eligible for MIND

eTable 2. Baseline Characteristics of the ACCORD-MIND MRI Cohort Compared to the Rest of ACCORD MIND

eTable 3. Reasons for a Missing Follow-Up MRI Scans

eFigure 1. Data shown are for the results for the primary cognitive outcome, the Digit Symbol Substitution Test. The horizontal bars represent 95% confidence intervals, and the vertical dashed line indicates the least square mean difference. The size of each square is proportional to the number of patients. P values are for tests for interaction.

eFigure 2. Data shown are for the results for a secondary cognitive outcome, the Rey Auditory Verbal Learning Test. The horizontal bars represent 95% confidence intervals, and the vertical dashed line indicates the least square mean difference. The size of each square is proportional to the number of patients. P values are for tests for interaction.

eFigure 3. Data shown are for the results for a secondary cognitive outcome, the Stroop Test. The horizontal bars represent 95% confidence intervals, and the vertical dashed line indicates the least square mean difference. The size of each square is proportional to the number of patients. P values are for tests for interaction. A positive difference reflects poorer performance.

**eTable 1**

|                                        | ACCORD-MIND  | Rest of ACCORD<br>Eligible for MIND |
|----------------------------------------|--------------|-------------------------------------|
| Number Enrolled (%)                    | 2977 (53)    | 2598 (47)                           |
| Age – mean (sd) years                  | 62.5 (5.8)   | 63.0 (6.0)                          |
| Sex: Female, %                         | 46.6         | 46.2                                |
| Education, %                           |              |                                     |
| Less than HS graduate                  | 13.2         | 18.3                                |
| HS graduate/GED                        | 25.8         | 26.4                                |
| Some college/tech                      | 34.5         | 30.6                                |
| College graduate or more               | 26.5         | 24.7                                |
| Network, %                             |              |                                     |
| Canada                                 | 10.1         | 13.2                                |
| Western                                | 20.5         | 16.6                                |
| Minn/Iowa                              | 22.6         | 14.4                                |
| Ohio/Mi                                | 12.1         | 14.1                                |
| Northeast                              | 12.6         | 19.9                                |
| Southeast                              | 22.2         | 21.8                                |
| VA                                     | 0            | 0                                   |
| Race, %                                |              |                                     |
| White, Non-Hispanic                    | 69.7         | 65.1                                |
| Black, Non-Hispanic                    | 16.3         | 20.6                                |
| Hispanic                               | 7.1          | 8.0                                 |
| Other                                  | 6.9          | 6.3                                 |
| Smoking Status, %                      |              |                                     |
| Current                                | 11.8         | 13.3                                |
| Former                                 | 43.5         | 41.9                                |
| Never                                  | 44.6         | 44.8                                |
| Self-reported history of depression    | 26.4         | 24.0                                |
| Systolic BP – mean (sd) mm Hg          | 135.5 (17.8) | 137.4 (17.3)                        |
| Diastolic BP – mean (sd) mm Hg         | 74.8 (10.7)  | 75.3 (10.6)                         |
| Duration of Diabetes – mean (sd) years | 10.4 (7.4)   | 11.1 (7.8)                          |
| HbA1c – mean (sd)                      | 8.3 (1.1)    | 8.2 (1.0)                           |
| Total Cholesterol (mg/dl)*             | 183.4 (42.0) | 186.1 (42.2)                        |
| Low-density lipoprotein (mg/dl)*       | 103.5 (33.7) | 107.5 (34.6)                        |
| High-density lipoprotein (mg/dl)*      |              |                                     |
| Women                                  | 47.1 (12.1)  | 47.5 (13.2)                         |
| Men                                    | 38.6 (9.3)   | 39.3 (10.0)                         |
| BMI – mean (sd)                        | 33.0 (5.4)   | 32.3 (5.6)                          |
| History of CVD, %                      | 29.2         | 30.3                                |

\* To convert to millimoles per liter, multiply by 0.02586.

**eTable 2**

|                                | <b>MIND-MRI*</b> | <b>MIND w/o MRI*</b> |
|--------------------------------|------------------|----------------------|
| Age (yrs)                      | 62.4 (5.7)       | 62.5 (5.9)           |
| Female %                       | 44.4             | 47.2                 |
| Race %                         |                  |                      |
| White, Non-Hispanic            | 69.1             | 70.5                 |
| Black, Non-Hispanic            | 16.7             | 16.2                 |
| Hispanic                       | 6.5              | 7.3                  |
| Other/Missing                  | 7.7              | 6.0                  |
| Education %                    |                  |                      |
| Less than HS graduate          | 10.3             | 13.9                 |
| HS graduate/GED                | 24.0             | 26.3                 |
| Some college/tech              | 34.2             | 34.6                 |
| College graduate or more       | 31.5             | 25.2                 |
| History of CVD %               | 25.7             | 30.1                 |
| Smoking Status %               |                  |                      |
| Never                          | 44.8             | 44.6                 |
| Former                         | 42.1             | 43.9                 |
| Current                        | 13.1             | 11.5                 |
| Hyperlipidemia %               | 68.6             | 63.1                 |
| Hypertension %                 | 80.6             | 81.5                 |
| Systolic Blood Pressure (mmHG) | 134.7 (17.9)     | 135.7 (17.7)         |
| Duration of Diabetes (yrs)     | 9.9 (7.2)        | 10.5 (7.4)           |
| HbA1c %                        | 8.2 (1.0)        | 8.3 (1.1)            |
| Serum glucose: mg/dl           | 173.1 (54.3)     | 176.1 (55.2)         |
| Depression [PHQ % > 10]†       | 15.2             | 18.5                 |
| Baseline DSST†                 | 53.4 (16.1)      | 52.3 (15.8)          |
| Baseline RAVLT†                | 7.5 (2.5)        | 7.5 (2.6)            |
| Baseline Stroop†               | 31.0 (15.5)      | 32.3 (17.0)          |
| Baseline Mini Mental†*         | 28 (27 – 29)     | 28 (26 – 29)         |

\* For continuous variables, mean (sd)

† DSST: number of correct cells (possible range 0 – 90); RAVLT: total number of words recalled (possible range 0 to 15); Stroop: Interference score; MMSE: possible range 0 – 30; PHQ: possible range 0 – 27



**eTable 3**

| <b>Reason</b>                  | <b>Glycemia Intervention*</b> |                             |
|--------------------------------|-------------------------------|-----------------------------|
|                                | <b>Intensive<br/>(n=294)</b>  | <b>Standard<br/>(n=320)</b> |
| Death before 40 month visit    | 11 (3.7)                      | 7 (2.2)                     |
| Poor image quality             | 6 (2.0)                       | 3 (0.9)                     |
| MRI exclusion                  | 8 (2.7)                       | 5 (1.6)                     |
| Claustrophobic / very high BMI | 3 (1.0)                       | 2 (0.6)                     |
| Refused / Withdrew Consent     | 11 (3.7)                      | 6 (1.9)                     |
| Moved                          | 7 (2.4)                       | 5 (1.6)                     |
| Unknown                        | 18 (6.1)                      | 19 (5.9)                    |
| <b>Total</b>                   | <b>64 (21.8)</b>              | <b>47 (14.7)</b>            |

\* Data shown are N (percent of total available baseline scans)

eFigure 1

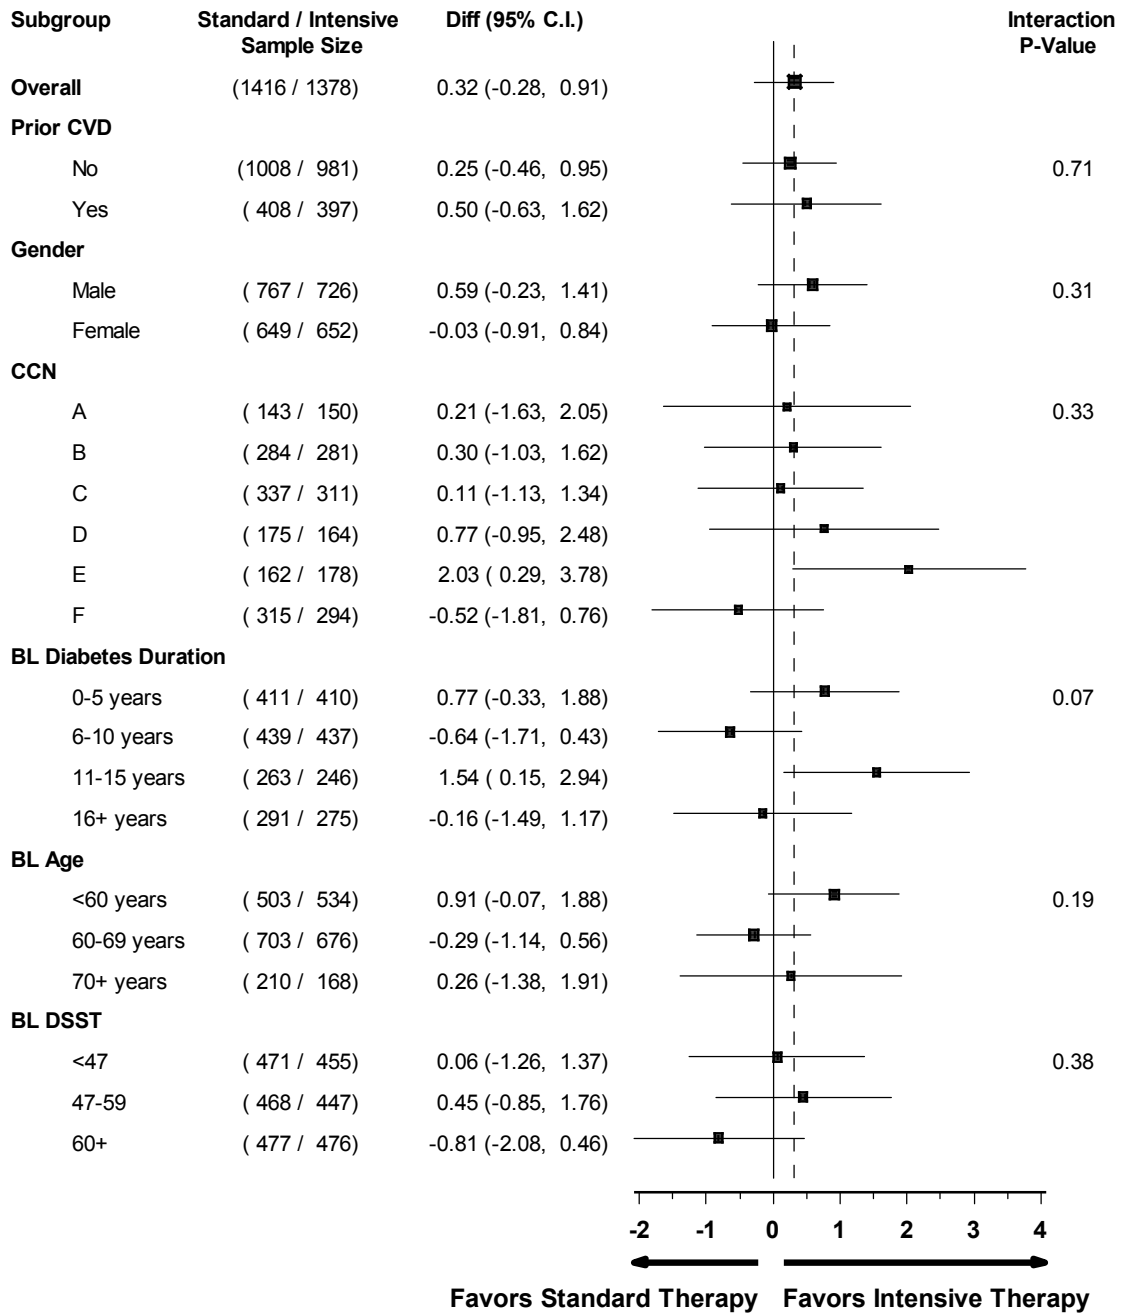

eFigure 2

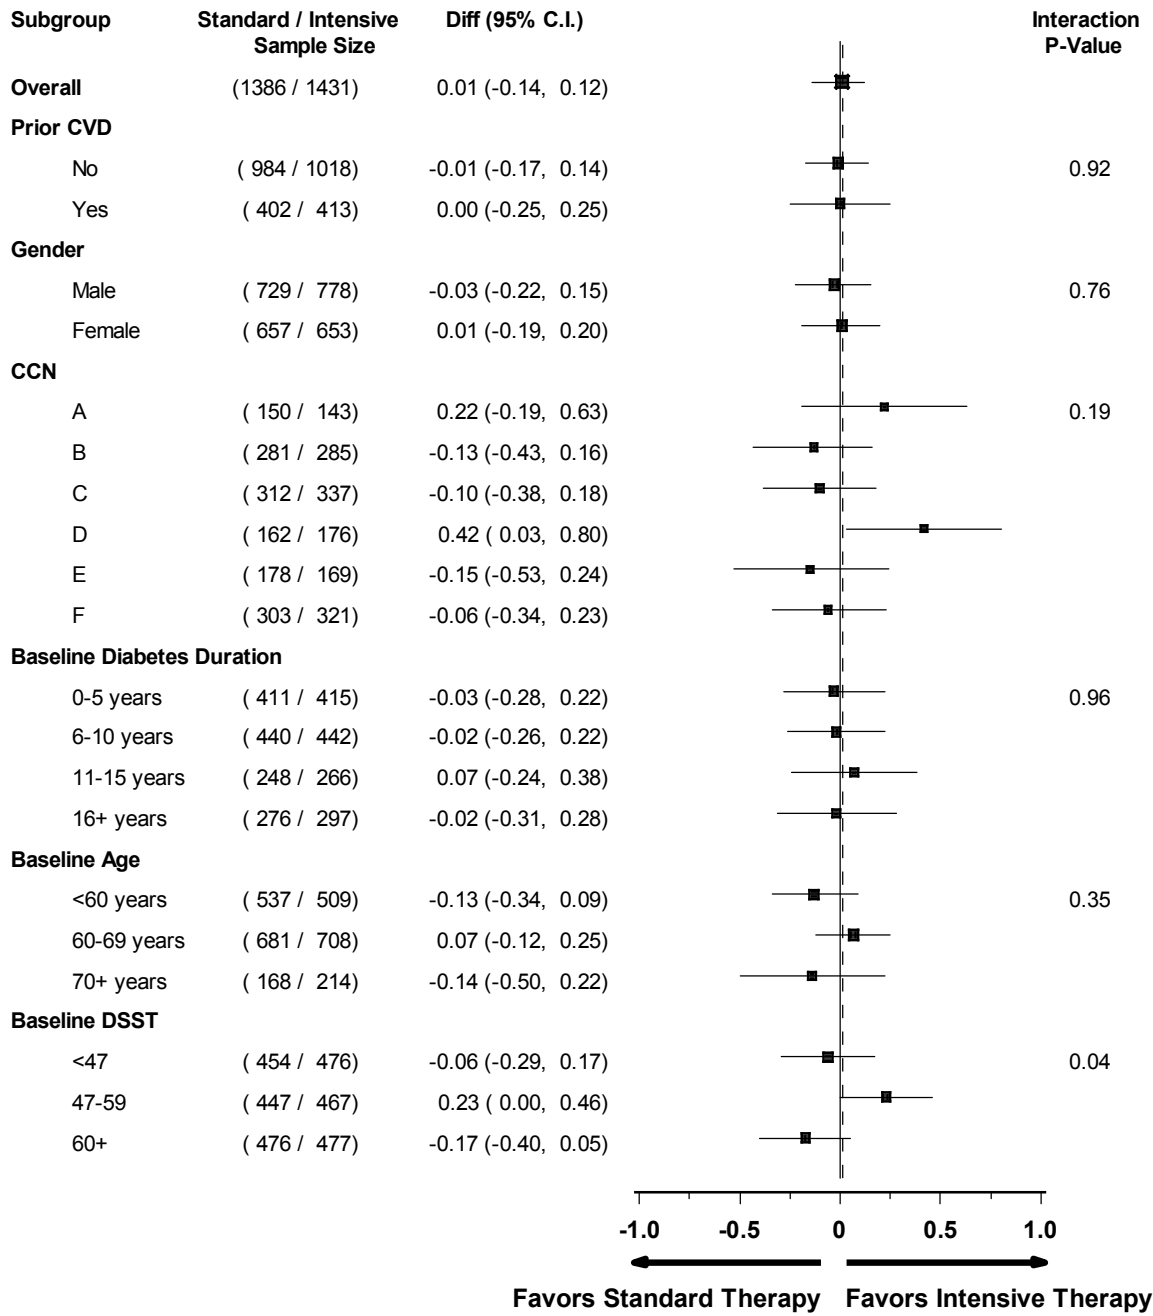

eFigure 3

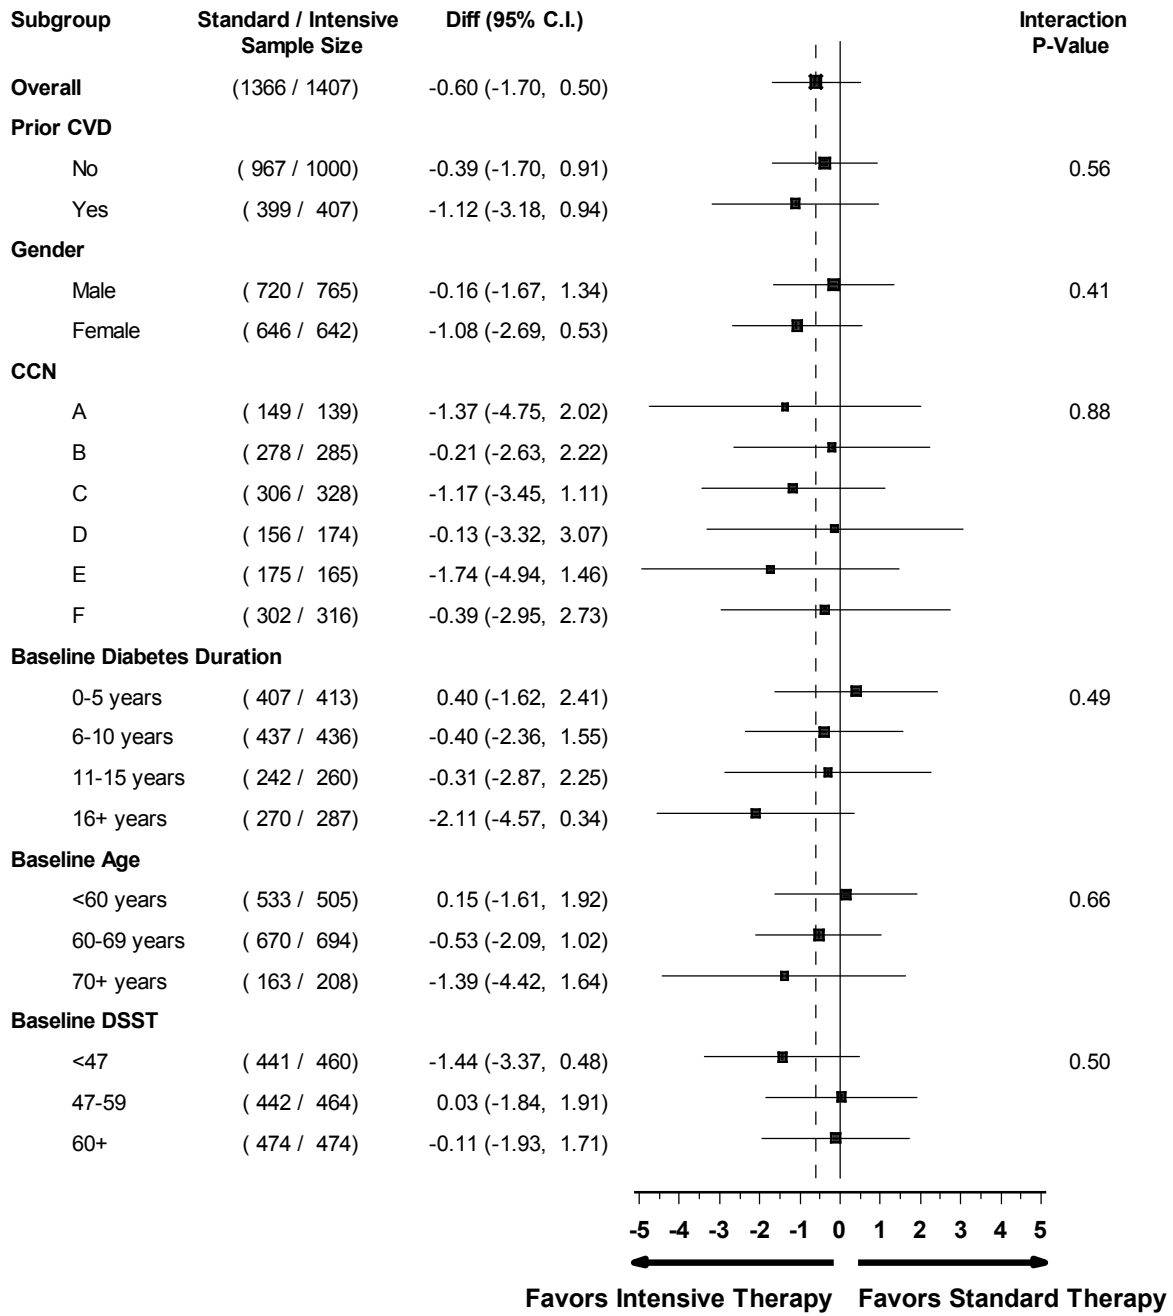

Supplement: NIHMS333637-supplement-01.pdf [file NIHMS333637-supplement-01.pdf]
